# Supplementary material for: Metallic bands in chevron-type polyacenes
Source: Royal Society of Chemistry journal article supplement (doi:10.1039/d0ra06007k), 2020-01-01
Supplement: d0ra06007k2.zip [file d0ra06007k2.zip]

RSC Advances
