# Supplementary figures and images for: Metallic bands in chevron-type polyacenes
Source: Royal Society of Chemistry journal article supplement (doi:10.1039/d0ra06007k), 2020-01-01

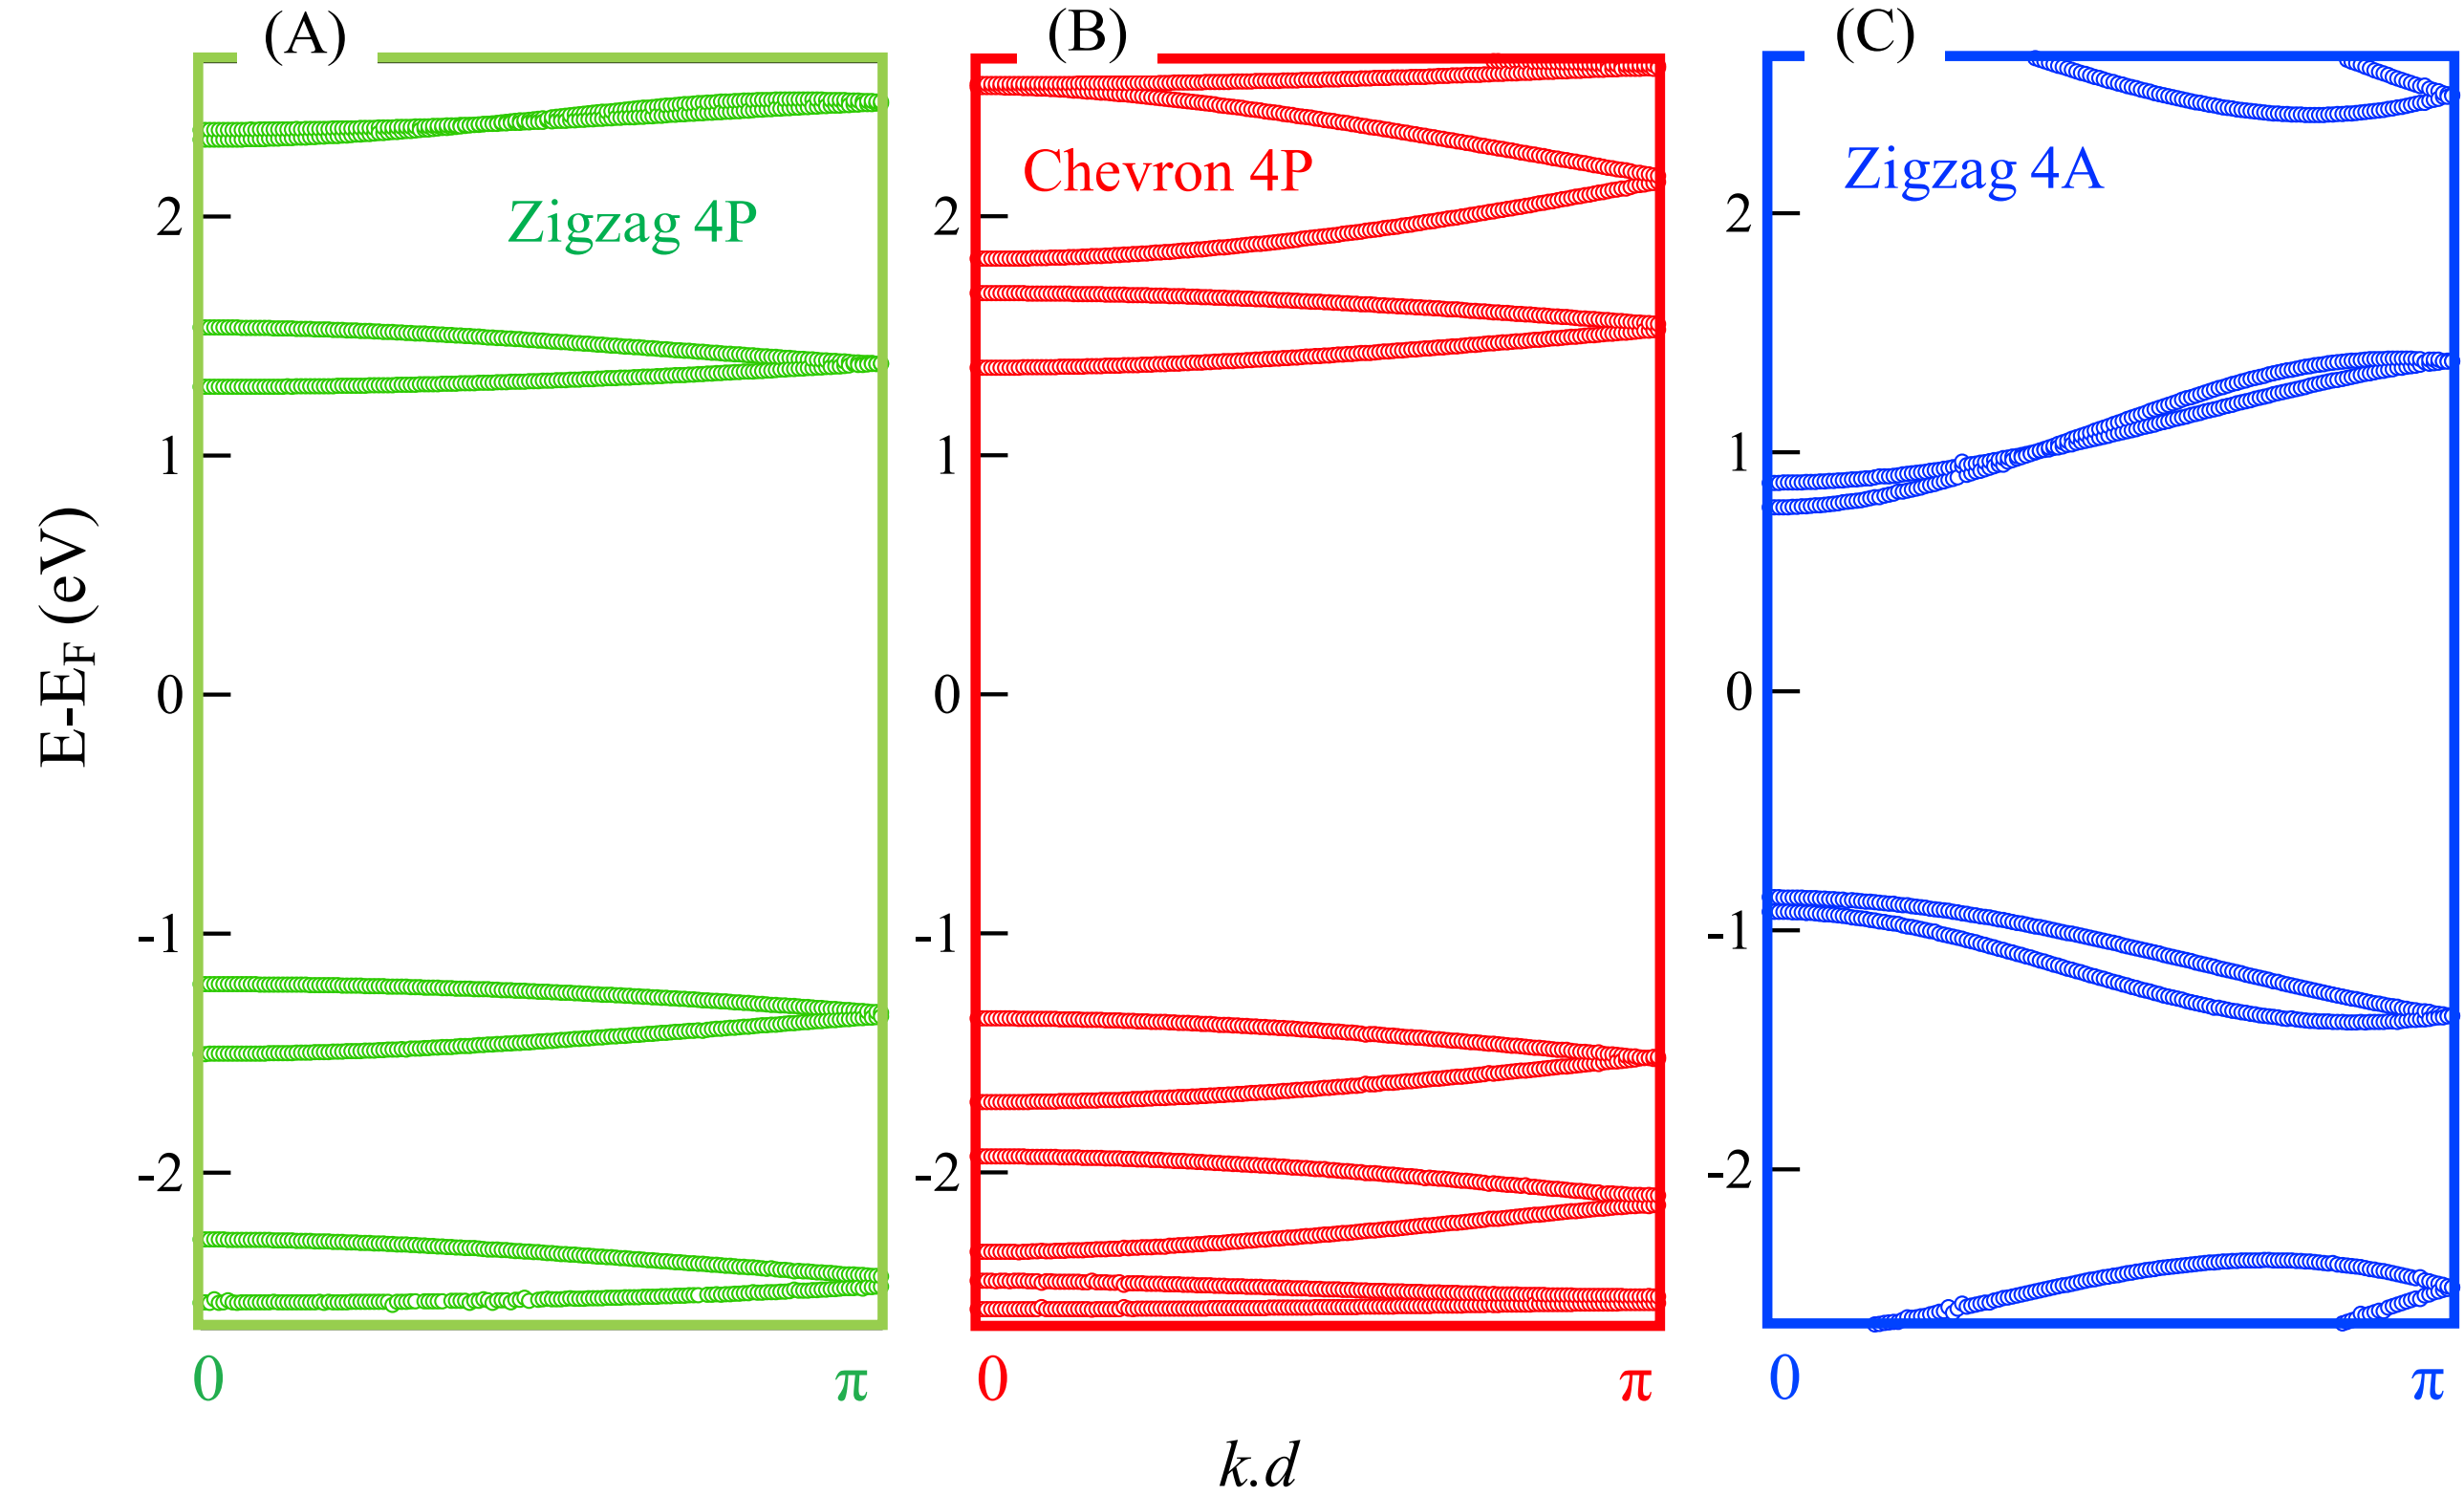

Supplement: d0ra06007k2.zip [file d0ra06007k2.zip]

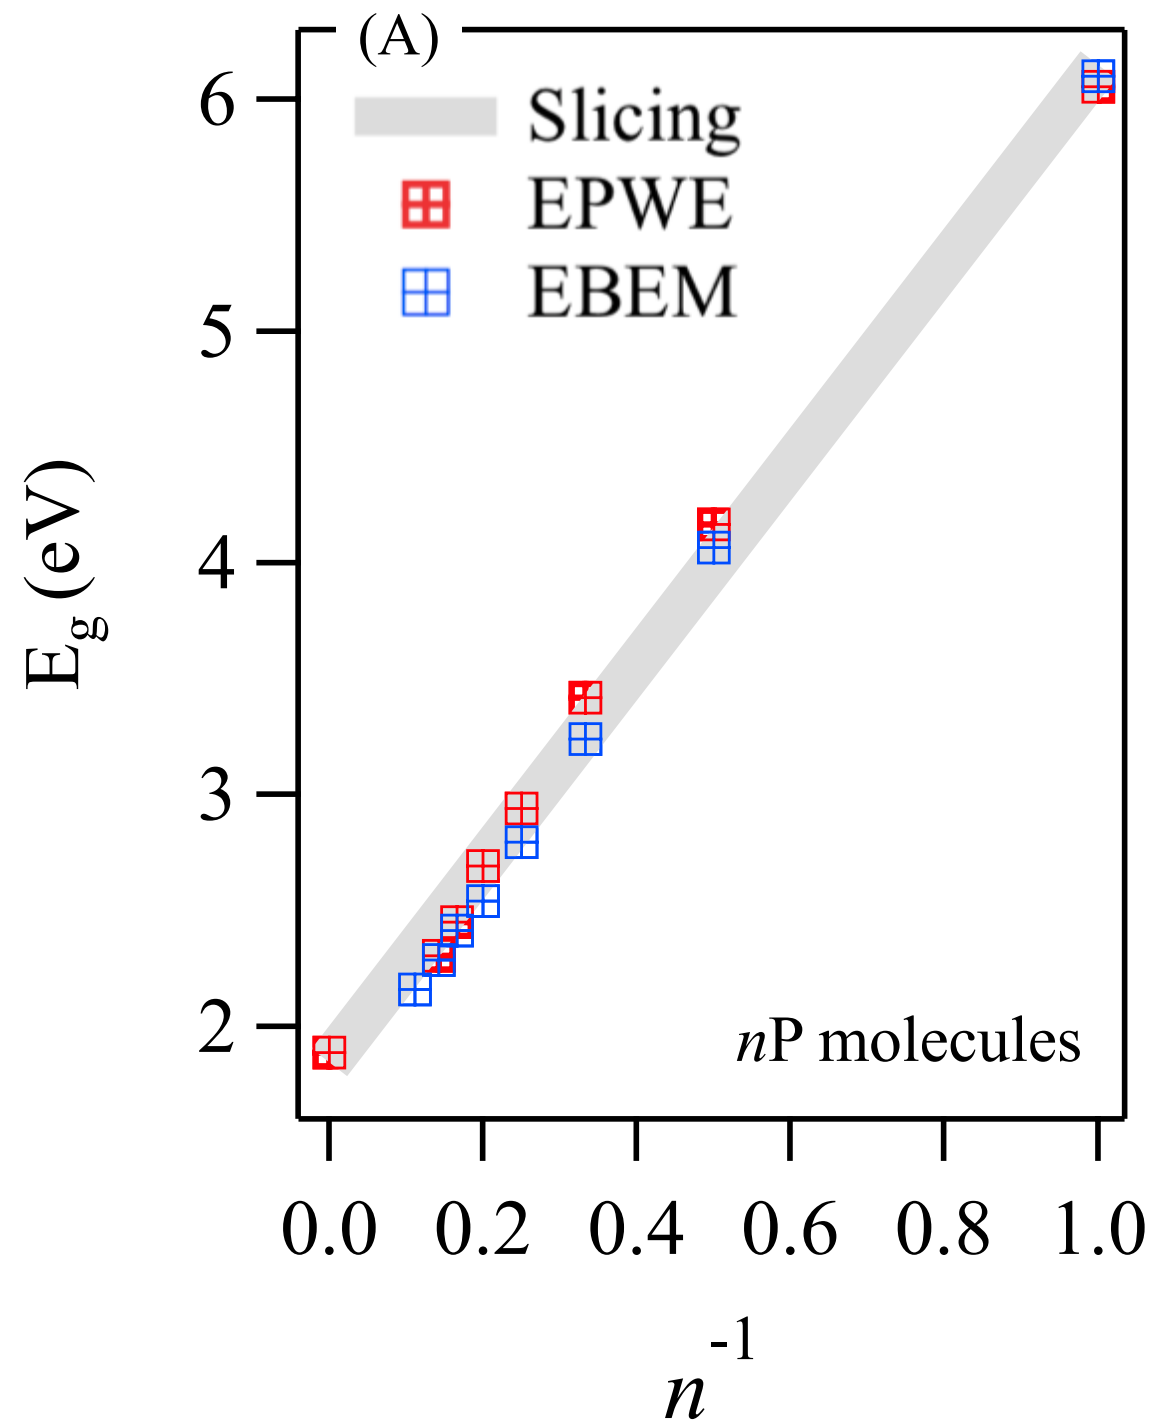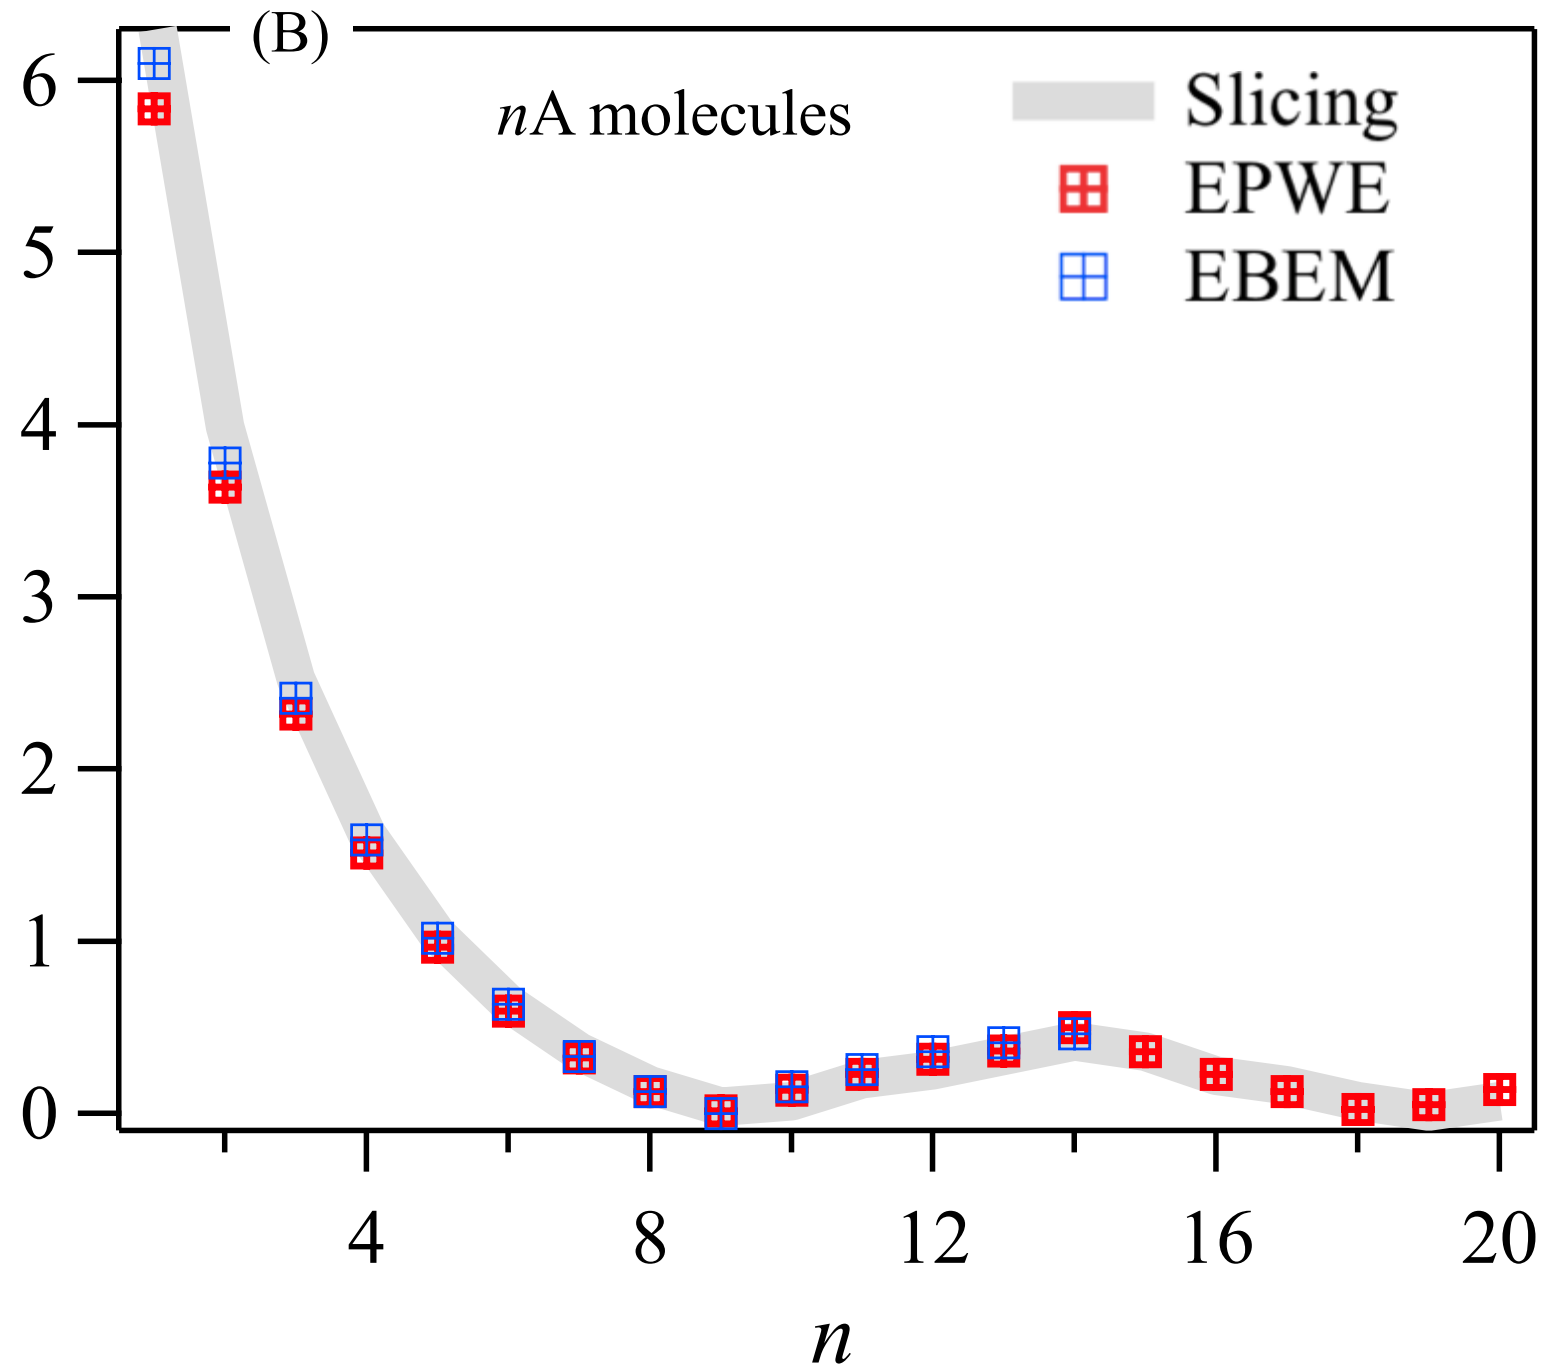

Supplement: d0ra06007k2.zip [file d0ra06007k2.zip]

LDOS (Arb.units)

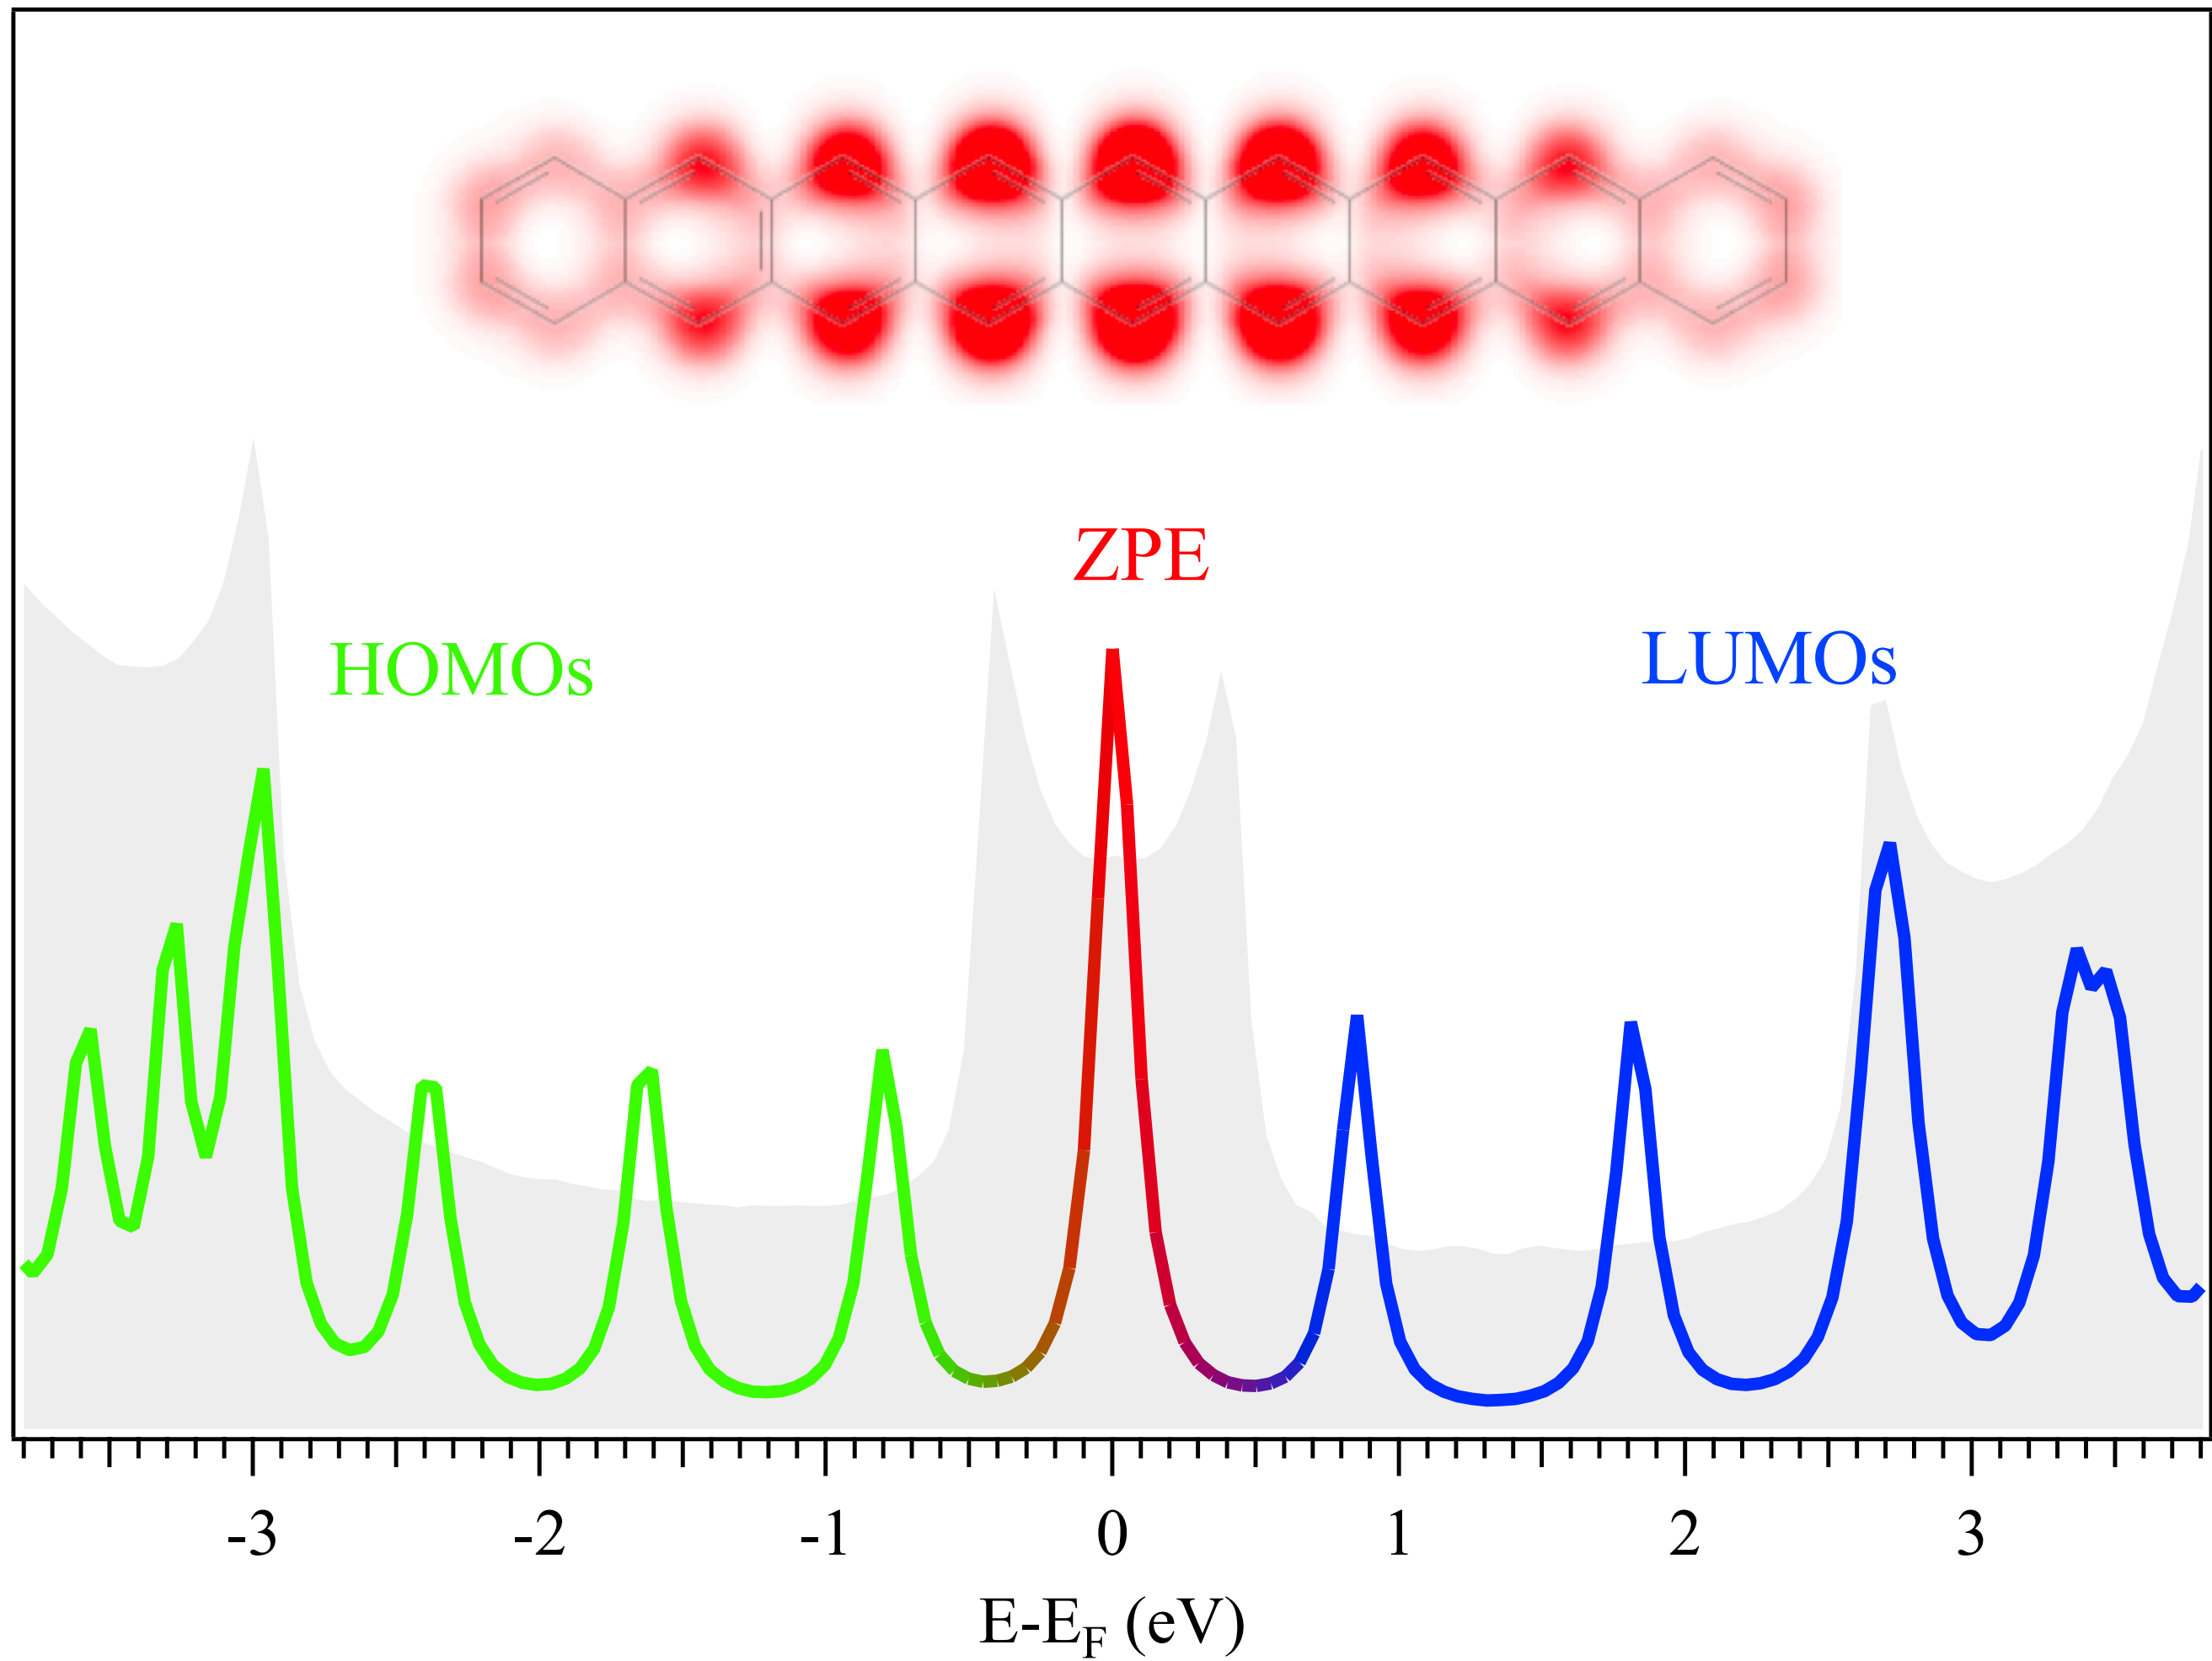

Supplement: d0ra06007k2.zip [file d0ra06007k2.zip]

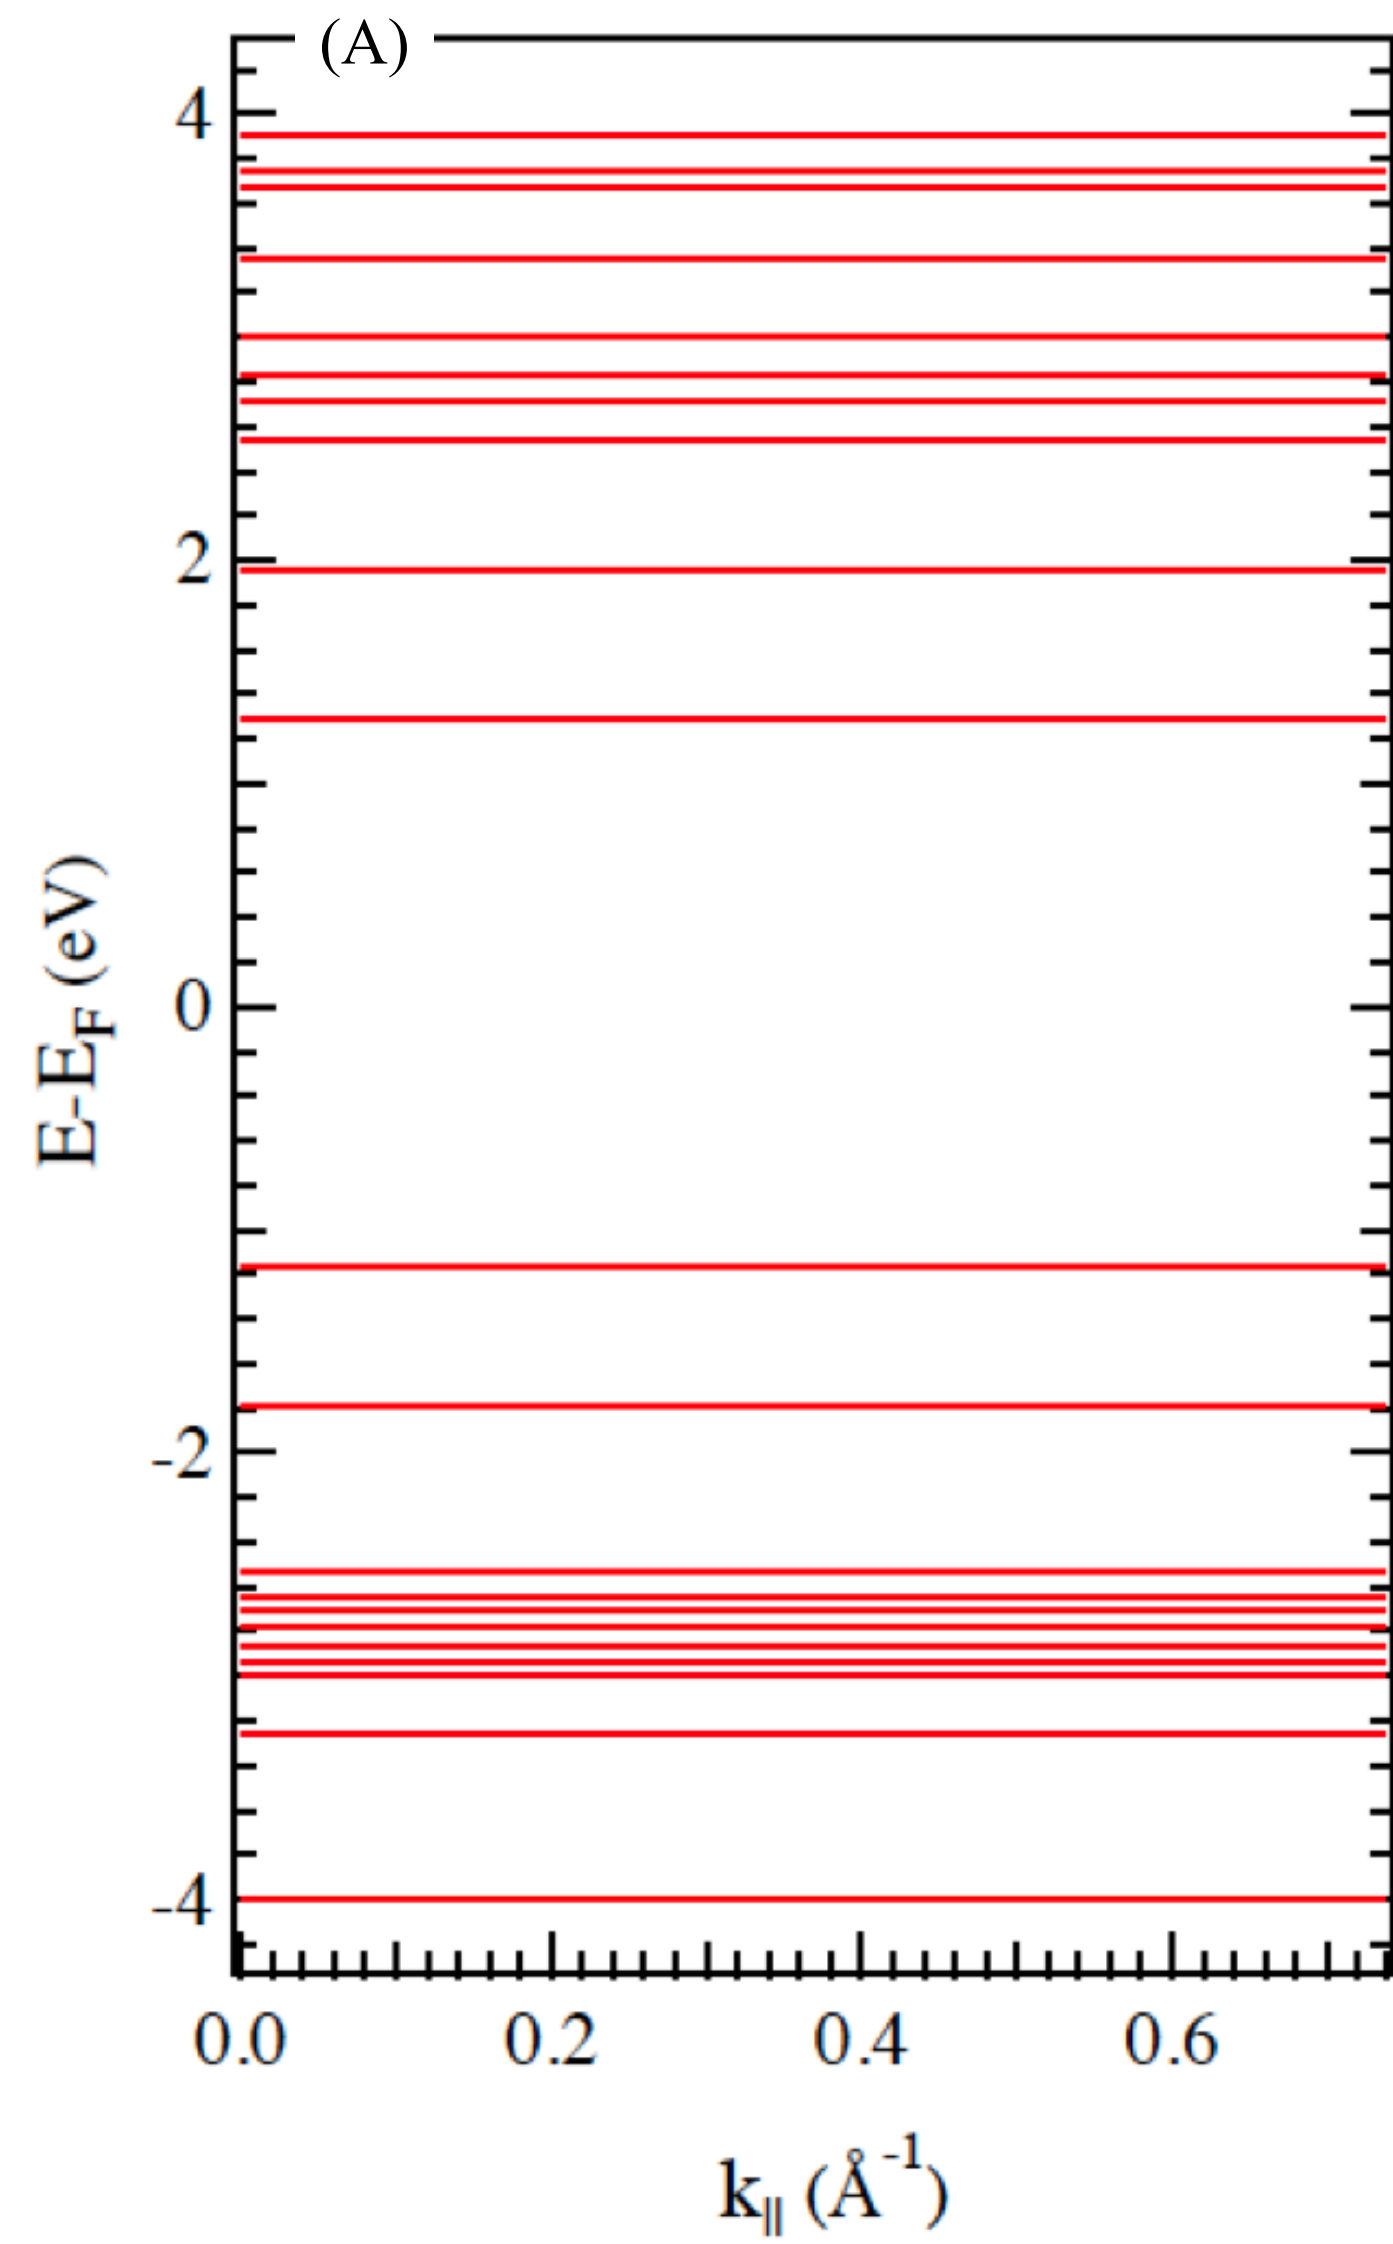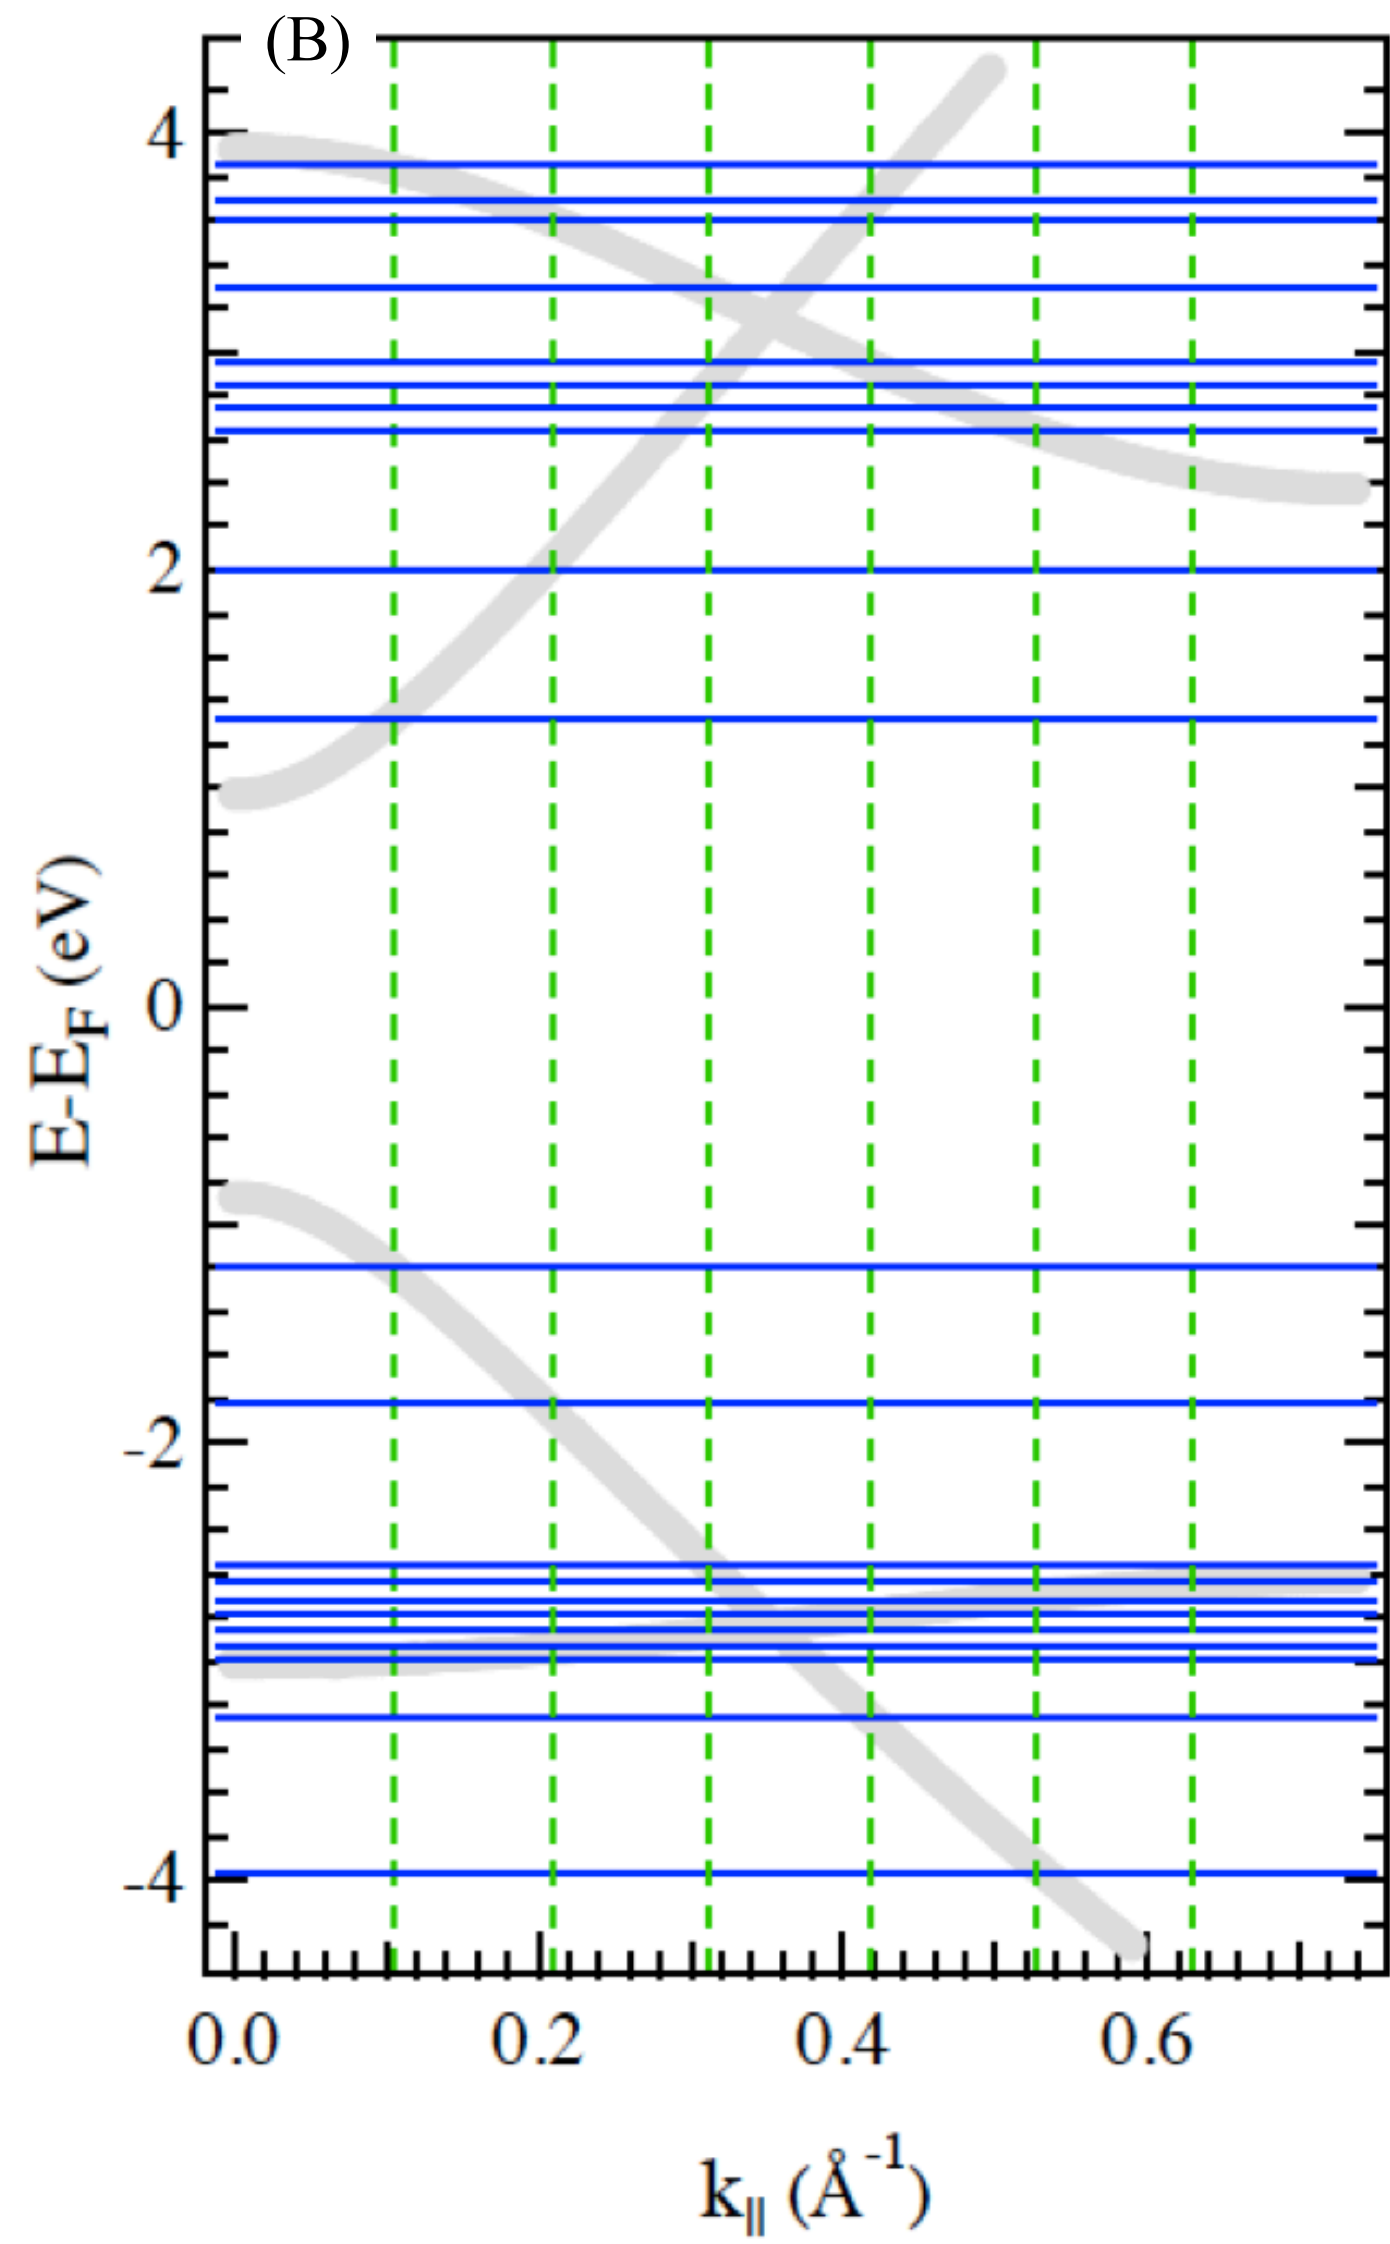

Supplement: d0ra06007k2.zip [file d0ra06007k2.zip]
